# Supplementary material for: From benchmarking alignment of genome assemblies to IMGT annotation: the paradigm of the bovine Bos taurus T cell receptor (TRG) locus
Source: Research Square preprint supplement (doi:10.21203/rs.3.rs-6524277/v1), 2025-06-27
Supplement: Supplementary file 1 [file 87508a017e497326732cff71.docx]

Supplementary Table 2

| TRGC cassettes | TRG1 (FWD) | | IMGT Repertoire (IG and TR) | | | | | NCBA_BosT1.0 | | ARS-UCD2.0 | |
| --- | --- | --- | --- | --- | --- | --- | --- | --- | --- | --- | --- |
|  | |  | | | | | PRJCA008887,chr 4,  GWHBISA00000000 | | NC_037331.1, chr 4, GCF_0022637953 | |
| Gene  order | IMGT gene names | S | CDR-IMGT | Fct | Alleles | Clones | Fct | Position  (start..end) | Fct | Position  (start..end) |
| TRG 5’ BORNE : **AMPH** | | | | | | |  | 82260021..82472865 |  | 82295815..82508662 |
| TRGC5 | 1 | **TRGV11** | 2 |  |  |  |  | P | 82483607..82483911 | P | 82520697..82521003 |
| 2 | TRGV3-1 | 3 | [8.7.4] | F | *01 | [NW_937068](https://www.imgt.org/ligmdb/view?id=NW_937068) | F | 82496819..82497322 | F | 82533930..82534433 |
| 3 | TRGV3-2 | 3 | [8.7.4] | F | *01 | [NW_937068](https://www.imgt.org/ligmdb/view?id=NW_937068) | F | 82502748..82503250 | F | 82539853..82540355 |
| 4 | TRGV7-1 | 4 | [8.6.6] | F | *01 | [NW_937068](https://www.imgt.org/ligmdb/view?id=NW_937068) | F | 82506805..82507313 | F | 82543908..82544416 |
| 5 | TRGV10-1 | 6 | [9.7.5] | F | *01 | [NW_937068](https://www.imgt.org/ligmdb/view?id=NW_937068) | F | 82511095..82511615 | F | 82548194..82548714 |
| 6 | TRGV4-1 | 5 | [8.4.x] | ‘F’ | *01 | [DQ179592](https://www.imgt.org/ligmdb/view?id=DQ179592) | F | 82513585..82514008 | F | 82550683..82551158 |
| 7 | TRGJ5-1 |  |  | F | *01 | [NW_937068](https://www.imgt.org/ligmdb/view?id=NW_937068) | F | 82520126..82520213 | F | 82557238..82557325 |
| 8 | **TRGJ5-2** |  |  |  |  |  | P | 82522731..82522787 | P | 82559830..82559887 |
| 9 | **TRGJ5-3** |  |  |  |  |  | F | 82524726..82524803 | F | 82561832..82561909 |
| 10 | **TRGJ5-4** |  |  |  |  |  | P | 82525048..82525087 | P | 82562154..82562192 |
| 11 | TRGC5 |  |  | F |  | **AY735449** | F | 82527823..82535308 | F | 82564929..82572412 |
| TRGC7 | 12 | TRGV8-3 | 1 | [3.8.5] | F | *01 | [AY644517](https://www.imgt.org/ligmdb/view?id=AY644517) | F | 82551688..82552196 | F | 82588783..82589291 |
| 13 | TRGV8-4 | 1 | [3.8.5] | F | *01 | [AY644517](https://www.imgt.org/ligmdb/view?id=AY644517) | - | - | F | 82598727..82599234 |
| 14 | TRGV8-4D |  |  |  |  |  | - | - | F | 82608675..82609182 |
| 15 | TRGV8-1 | 1 | [3.8.5] | F | *01 | [AY644517](https://www.imgt.org/ligmdb/view?id=AY644517) | F | 82561885..82562393 | F | 82618877..82619385 |
| 16 | TRGV8-2 | 1 | [3.8.5] | F | *01 | [AY644517](https://www.imgt.org/ligmdb/view?id=AY644517) | F | 82567620..82568113 | F | 82624615..82625108 |
| 17 | TRGV2-1 | 1 | [6.8.5] | F | *01 | [AY644517](https://www.imgt.org/ligmdb/view?id=AY644517) | F | 82581708..82582239 | F | 82638710..82639241 |
| 18 | **TRGJ7-1** |  |  | F |  | [AY644517](https://www.imgt.org/ligmdb/view?id=AY644517)  (70099..70186) | F | 82588078..82588165 | F | 82645083..82645170 |
| 19 | TRGC7 |  |  | P |  |  | P | 82593069..82604475 | P | 82650078..82661432 |
| TRGC3 | 20 | TRGV9-1 | 1 | [6.8.5] | F | *01 | [AY644517](https://www.imgt.org/ligmdb/view?id=AY644517) | F | 82613311..82613864 | F | 82670317..82670862 |
| 21 | TRGV9-3 |  |  |  |  |  | F | 82628021..82628566 | - |  |
| 22 | TRGV9-2 | 1 | [6.8.5] | F | *01 | [AY644517](https://www.imgt.org/ligmdb/view?id=AY644517) | F | 82642172..82642715 | F | 82692892..82693433 |
| 23 | TRGJ3-1 |  |  | F | *01 | [AY644517](https://www.imgt.org/ligmdb/view?id=AY644517) | F | 82649058..82649145 | F | 82699771..82699858 |
| 24 | **TRGJ3-3** |  |  | **P** |  | [AY644517](https://www.imgt.org/ligmdb/view?id=AY644517)  (129614..129658) | P | 82653918..82653962 | P | 82704404..82704448 |
| 25 | **TRGC3** |  |  | F |  | **D90414** | F | 82655493..82659912 |  | 82705979..82710395 |
| TRGC8 | 26 | TRGV1-2 | 1 | [5.8.5] | F | *01 | [AY644517](https://www.imgt.org/ligmdb/view?id=AY644517) | F | 82670344..82670863 | - | - |
| 27 | **TRGJ8-2** |  |  |  |  |  | F | 82679469..82679556 | - | - |
| 28 | **TRGJ8-4** |  |  |  |  |  | P | 82684346..82684390 | - | - |
| 29 | **TRGC8** |  |  | F |  |  | F | 82685923..82690339 | - |  |
| TRGC4 | 30 | TRGV1-1 |  |  |  |  |  | F | 82700769..82701288 | F | 82720344..82720862 |
| 31 | TRGJ4-1 |  |  | F | *01 | [AY644517](https://www.imgt.org/ligmdb/view?id=AY644517) | F | 82710726..82710800 | F | 82730301..82730375 |
| 32 | TRGJ4-2 |  |  | F | *01 | [AY644517](https://www.imgt.org/ligmdb/view?id=AY644517) | F | 82714115..82714192 | F | 82733690..82733767 |
| 33 | **TRGJ4-3** |  |  | P |  | [AY644517](https://www.imgt.org/ligmdb/view?id=AY644517)  (159548..159586) | P | 82714740..82714778 | P | 82734315..82734353 |
| 34 | **TRGC4** |  |  | F |  | **X63680** | F | 82718087..82726227 | F | 82737659..82745783 |

| TRGC  cassettes | TRG2 (REV) | | IMGT Repertoire (IG and TR) | | | | | NCBA_BosT1.0 | | ARS-UCD2.0 | |
| --- | --- | --- | --- | --- | --- | --- | --- | --- | --- | --- | --- |
| Gene  order | IMGT gene names | S | CDR-IMGT | Fct | Alleles | Clones | Fct | Position  (start..end) | Fct | Position |
| TRGC1 | 1 | TRGV5-1 | 1 | [5.8.5] | F | *01 | [AY644518](https://www.imgt.org/ligmdb/view?id=AY644518) | F | 50184099..50184618 | F | 50162194..50162713 |
| 2 | TRGJ1-1 |  |  | F | *01 | [AY644518](https://www.imgt.org/ligmdb/view?id=AY644518) | F | 50177380..50177466 | F | 50155430..50155517 |
| 3 | TRGJ1-2 |  |  | F | *01 | [AY644518](https://www.imgt.org/ligmdb/view?id=AY644518) | F | 50174409..50174486 | F | 50152461..50152538 |
| 4 | **TRGJ1-3** |  |  | P |  | [AY644518](https://www.imgt.org/ligmdb/view?id=AY644518)  (105392..105431) | P | 50174121..50174160 | P | 50152173..50152212 |
| 5 | TRGC1 |  |  |  |  | **D90409** | F | 50164084..50171394 | F | 50142142..50149450 |
| TRGC2 | 6 | TRGV6-1 | 7 | [5.8.5] | F | *01 | [AY644518](https://www.imgt.org/ligmdb/view?id=AY644518) | F | 50155319..50155827 | P | 50133367..50133876 |
| 7 | **TRGJ2-4** |  |  | F |  | [AY644518](https://www.imgt.org/ligmdb/view?id=AY644518)  (132089..132176) | F | 50147404..50147487 | F | 50125453..50125537 |
| 8 | TRGV5-2 | 1 | [5.8.5] | F | *01 | [AY644518](https://www.imgt.org/ligmdb/view?id=AY644518) | F | 50144476..50145017 | F | 50122531..50123071 |
| 9 | TRGJ2-1 |  |  | F | *01 | [AC172685](https://www.imgt.org/ligmdb/view?id=AC172685) | F | 50127715..50127802 | F | 50105771..50105858 |
| 10 | TRGJ2-2 |  |  | F | *01 | [AY644518](https://www.imgt.org/ligmdb/view?id=AY644518) | F | 50124739..50124816 | F | 50102791..50102872 |
| 11 | **TRGJ2-3** |  |  | P |  | [AY644518](https://www.imgt.org/ligmdb/view?id=AY644518)  (138343..138382) | P | 50124455..50124493 | P | 50102511..50102549 |
| 12 | TRGC2 |  |  | F |  | **D90411** | F | 50112938..50121390 | F | 50091001..50099445 |
| TRGC6 | 13 | TRGV6-2 | 7 | [5.8.5] | F | *01 | [AC172685](https://www.imgt.org/ligmdb/view?id=AC172685) | F | 50104045..50104553 | F | 50082085..50082593 |
| 14 | **TRGJ6-2** |  |  | - |  |  | P | 50097966..50098050 | P | 50076006..50076089 |
| 15 | TRGJ6-1 |  |  | F | *01 | [AY644518](https://www.imgt.org/ligmdb/view?id=AY644518) only for info  (158766 | F | 50094037..50094114 | F | 50072078..50072155 |
| 16 | **TRGJ6-3** |  |  |  |  | [AY644518](https://www.imgt.org/ligmdb/view?id=AY644518)  (159055..159094) | - |  | - |  |
| 17 | TRGC6 |  |  | F |  | **AY644518** | F | 50078423..50089166 | F | 50056458..50067206 |
|  | TRG 3’ BORNE : **STARD3NL** | | | | | | |  | 50009435..50070627 |  | 49987458..50048659 |

**Supplementary Table2 |**These two tables are bovine TRG locus gene order for the different assemblies (NCBA_BosT1.0, ARS-UCD2.0, NW_937068, AY644517, and AY644518), new genes in bold and a dash means a gene is absent in one assembly. FWD (forward) and REV (reverse) are the orientation of the TRG1 and TRG2 locus, respectively relative to chromosome 4. All genes of TRG1 (FWD) and TRG2 (REV) are in direct orientation 5’>3’ in their respective locus. Owing to the REV orientation of TRG2, on the chromosome the 3’ BORNE STARD3NL is localized on the chromosome 4 upstream of TRGC6.

S : TRGV subgroup, Fct : functionality
