# Supplementary material for: From benchmarking alignment of genome assemblies to IMGT annotation: the paradigm of the bovine Bos taurus T cell receptor (TRG) locus
Source: Research Square preprint supplement (doi:10.21203/rs.3.rs-6524277/v1), 2025-06-27
Supplement: Supplementary file 2 [file af80936a6e9c4306a2153461.docx]

| | Primer name | Sequence | Forward/Reverse | | --- | --- | --- | | TRGC1, TRGC2 | GAAGTGTCTGCCTCGAGGTT | Reverse | | TRGC3, TRGC-new | AAACATAGTGGGCTTGGGGG | Reverse | | TRGC4 | AGTGGGCTTGGGTGAAATGT | Reverse | | TRGC5 | CAGCCCCGTGGAGTTTTACT | Reverse | | TRGC6 | TTGGGGAGGTATCTGCAGGA | Reverse | | TRGV1-1 | GCTCCCCAACGCCTTTTCTA | Forward | | TRGV2-1 | GCTCCTCGACGCCTTCTTTA | Forward | | TRGV3-1 | CGGCAGAAAAAGGATCAGGC | Forward | | TRGV3-2 | GTTCACTGGTACCGGCAGAA | Forward | | TRGV4-1 | GAGCCCCTGAAACGAATCCT | Forward | | TRGV5-1, TRGV5-2 | AGGCTGTGCTTGAATCAGGA | Forward | | TRGV6-1, TRGV6-2 | ATCTAGCCTTGTCCAAGCGG | Forward | | TRGV7-1 | TTGTCTTAGATGCCCCTGCG | Forward | | TRGV8-1, TRGV8-3, TRGV8-4 | GGAATCAGTGAAGGGAAATAC | Forward | | TRGV8-2 | CGACGCCTTCTCCACTACAT | Forward | | TRGV9-12 | GTACCCCGACGCCTTCTCTA | Forward | |  |  |
| --- | --- | --- | --- | --- | --- | --- | --- | --- | --- | --- | --- | --- | --- | --- | --- | --- | --- | --- | --- | --- | --- | --- | --- | --- | --- | --- | --- | --- | --- | --- | --- | --- | --- | --- | --- | --- | --- | --- | --- | --- | --- | --- | --- | --- | --- | --- | --- | --- | --- | --- | --- | --- | --- |

**Supplementary Table1 |**Primer for the construction of bovine PBMC TRG receptor library
